# Supplementary material for: Pancreatic Cystic Lesions: Pathogenesis and Malignant Potential
Source: Diseases. 2018 Jun 13;6(2):50. doi: 10.3390/diseases6020050 (PMC6023528; doi:10.3390/diseases6020050)
Supplement: Supplementary file 1 [file diseases-06-00050-s001.pdf]

| PCL type   | % of PCLs | Epidemiology:<br>Gender and<br>Age         | Location in<br>pancreas | Histological features                                                                                   | Immunohistoch<br>emical features                                                                                                                                                 | Genomic<br>mutations                                  | Relative<br>Invasion Rate | Recurrence<br>following<br>resection | Overall 5 year<br>survival rate                 |
|------------|-----------|--------------------------------------------|-------------------------|---------------------------------------------------------------------------------------------------------|----------------------------------------------------------------------------------------------------------------------------------------------------------------------------------|-------------------------------------------------------|---------------------------|--------------------------------------|-------------------------------------------------|
| IPMN       | 21-33%    | Slightly more in<br>men; 6th-7th<br>decade | Head                    | Gastric, intestinal,<br>pancreaticobiliary &<br>oncocytic types<br>(see Table 1 for further<br>details) | Mucin<br>(see Table 1 for<br>further details)                                                                                                                                    | KRAS Codon 12;<br>GNAS Codon<br>201                   | 27.6%-68%                 | 0-41.7%                              | 40-60%<br>(see Table 1<br>for rates by<br>type) |
| MCN        | 10%       | Predominately<br>in women; 4th<br>decade   | Body or tail            | Ovarian-type storma                                                                                     | Mucin:<br>40% are<br>MUC2+, CDX2+<br>Negative for<br>mucin,                                                                                                                      | KRAS codon 12;<br>RNF43                               | 17%                       | 4.5%                                 | 75-93%                                          |
| SPT        | 5%        | Predominately<br>in women; 3rd<br>decade   | Head or tail            | Solid, pseudopapillary<br>and/or hemorrhagic<br>pseudocystic<br>structures, PAS<br>positive             | synaptophysin,<br>keratin; Positive<br>for A1AT, NSE,<br>vimentin, beta-<br>catenin &<br>trypsin<br>Negative for<br>mucin; Positive<br>for<br>synaptophysin<br>&<br>chromogranin | CTNNB1;<br>aneuploidy,<br>involving 16p,<br>11p       | 8-20%                     | 10-15%                               | 95-100%                                         |
| Cystic-NET | 10%       | Equal in men &<br>women; 4th-6th<br>decade | Neck, body<br>or tail   | Cystic neoplasm; lack<br>of intra-luminal<br>tumoral necrosis &<br>nuclear pleomorphism                 |                                                                                                                                                                                  | Sporadic;<br>association with<br>MEN1, VHL, &<br>NF-1 | 9.7%                      | 4.8%-28.6%                           | 92%                                             |

TABLE 2: A summary of the different types of PCLs (10-86)
